# Supplementary material for: Molecular markers and molecular basis of plant type related traits in maize
Source: Front Genet. 2024 Nov 1;15:1487700. doi: 10.3389/fgene.2024.1487700 (PMC11564161; doi:10.3389/fgene.2024.1487700)
Supplement: Supplementary file 6 [file Table5.xlsx]

## Sheet: Sheet1
Table S4.Membership of 160 maize inbred lines corresponding to different subgroups.
Number ID	Substructure 1 (Lancaster group)	Substructure 2 (P group)	Substructure 3 (Iodent group)	Substructure 4 (Improvement Reid group)	Substructure 5 (Reid group)	Substructure 6 (European durum group)	Name/Resource	Substructure
1	1e-05	1.3e-05	1e-05	1e-05	0.999947	1e-05	DF30M	5
2	0.99995	1e-05	1e-05	1e-05	1e-05	1e-05	G37	1
3	0.474832	1e-05	1e-05	1e-05	1e-05	0.525128	JD73F	1, 6
4	0.999949	1e-05	1e-05	1e-05	1.1e-05	1e-05	G37	1
5	1e-05	1e-05	1e-05	0.102426	0.897534	1e-05	Wo9M	4, 5
6	1e-05	1e-05	1e-05	1e-05	0.99995	1e-05	PH6WC	5
7	0.503038	1e-05	1e-05	1.9e-05	1e-05	0.496913	15T-Q137	1, 6
8	0.105914	0.04001	1e-05	0.225387	0.513715	0.114964	PH6WC	1, 2, 4, 5, 6
9	1e-05	1e-05	1e-05	1e-05	0.99995	1e-05	PH6WC	5
10	0.499899	1e-05	1e-05	1e-05	1e-05	0.500061	15T-Q138	1, 6
11	1e-05	1e-05	1e-05	1e-05	0.99995	1e-05	15T-Q401	5
12	1e-05	1e-05	1e-05	1e-05	0.99995	1e-05	15T-Q467	5
13	1e-05	1e-05	1e-05	1e-05	0.99995	1e-05	15T-Q400	1
14	0.52925	1.2e-05	1e-05	1e-05	1e-05	0.470708	T1	1, 6
15	1e-05	1e-05	1e-05	1e-05	0.99995	1e-05	15T-Q1	5
16	1e-05	1e-05	1e-05	0.99995	1e-05	1e-05	ZHENG58	4
17	1e-05	1e-05	1e-05	1e-05	0.99995	1e-05	PH6WC	5
18	0.615434	1.4e-05	1.1e-05	1e-05	1e-05	0.38452	XY128M	1, 6
19	1e-05	1.3e-05	1e-05	1e-05	0.999947	1e-05	XY688M	5
20	0.049775	1.6e-05	1e-05	1.9e-05	1e-05	0.95017	XY696F	1, 6
21	1e-05	1e-05	0.117043	1.8e-05	0.882909	1e-05	15H-495	3, 5
22	1e-05	0.99995	1e-05	1e-05	1e-05	1e-05	DF26F	2
23	0.38333	1e-05	1e-05	1e-05	1e-05	0.61663	XY508F	1, 6
24	1e-05	0.20611	1e-05	0.772526	1e-05	0.021334	C7-2	2, 4, 6
25	0.068023	0.147165	0.286775	0.430378	0.025537	0.042122	15T-Q253	1, 2, 3, 4, 5, 6
26	1e-05	1e-05	0.799973	1e-05	0.199987	1e-05	M753M	3, 5
27	0.061444	0.03794	1e-05	0.85705	0.012215	0.031341	LH16M	1, 2, 4, 5, 6
28	0.039573	0.107347	0.265457	0.497721	0.089893	1e-05	LM33M	1, 2, 3, 4, 5
29	0.06431	1e-05	0.354399	0.537422	0.037653	0.006206	JD27F	1, 3, 4, 5, 6
30	1e-05	0.118368	0.01315	0.20288	0.152739	0.512853	JD519M	2, 3, 4, 5, 6
31	0.886068	0.033728	0.007162	1e-05	0.044256	0.028776	15T-TZ1	1, 2, 3, 5, 6
32	1e-05	1e-05	1e-05	0.99995	1e-05	1e-05	G1	4
33	0.99995	1e-05	1e-05	1e-05	1e-05	1e-05	G36	1
34	0.99995	1e-05	1e-05	1e-05	1e-05	1e-05	G37	1
35	0.99994	1.4e-05	1e-05	1.6e-05	1e-05	1e-05	G38	1
36	0.999944	1e-05	1e-05	1e-05	1.6e-05	1e-05	G39	1
37	0.99995	1e-05	1e-05	1e-05	1e-05	1e-05	G40	1
38	0.99995	1e-05	1e-05	1e-05	1e-05	1e-05	G41	1
39	0.999946	1e-05	1e-05	1.4e-05	1e-05	1e-05	G43	1
40	0.47363	1e-05	1e-05	1e-05	0.437969	0.088372	G71	1, 5, 6
41	0.053861	0.25284	0.110396	0.44948	0.042835	0.090588	G72	1, 2, 3, 4, 5, 6
42	0.038286	0.225158	0.140291	0.322527	0.236439	0.037299	G82	1, 2, 3, 4, 5, 6
43	0.031186	0.131581	0.352368	0.294184	0.050757	0.139923	G100	1, 2, 3, 4, 5, 6
44	1e-05	0.99995	1e-05	1e-05	1e-05	1e-05	X178	2
45	1e-05	0.99995	1e-05	1e-05	1e-05	1e-05	QI319	2
46	1e-05	1e-05	1.1e-05	0.999949	1e-05	1e-05	D340	4
47	0.747828	1e-05	0.045876	1e-05	0.206266	1e-05	ZQB1	1, 5
48	1e-05	1e-05	1e-05	0.99995	1e-05	1e-05	ZHENG58	4
49	1e-05	0.030926	1e-05	0.969034	1e-05	1e-05	ZHENG58S	2, 4
50	1e-05	0.075642	0.043646	0.83455	0.006393	0.039759	15T-Q275	2, 3, 4, 5, 6
51	0.042631	0.173434	0.020671	0.58926	0.173993	1e-05	15T-Q265	1, 2, 3, 4, 5
52	0.338826	0.159179	0.101298	0.160666	0.24002	1e-05	15T-Q208	1, 2, 3, 4, 5
53	0.052991	1e-05	1e-05	1e-05	1e-05	0.946969	15T-Q184	1, 6
54	0.696771	1e-05	1e-05	1e-05	0.303189	1e-05	15T-Q163	1, 5
55	1e-05	1e-05	1e-05	1e-05	1e-05	0.99995	15T-Q151	6
56	0.323896	0.240674	1.7e-05	1e-05	0.379928	0.055476	12NJ129	1, 2, 5, 6
57	0.731991	1.5e-05	1.6e-05	1e-05	0.267958	1e-05	15T-Q106	1, 5
58	0.729273	1.1e-05	1e-05	1e-05	0.270686	1e-05	15T-Q103	1, 5
59	1e-05	0.175296	0.026995	0.665995	0.038702	0.093002	12NJ217	2, 3, 4, 5, 6
60	1e-05	1e-05	1.6e-05	1e-05	0.999944	1e-05	15T-Q55	4
61	1e-05	1e-05	1e-05	1.5e-05	0.999945	1e-05	15T-Q50	4
62	1e-05	1e-05	1.5e-05	1e-05	0.999945	1e-05	15T-Q48	4
63	1e-05	1e-05	1e-05	1e-05	0.99995	1e-05	15T-Q50	4
64	0.056295	0.043823	0.053071	0.337856	0.194895	0.31406	15T-Q38	1, 2, 3, 4, 5, 6
65	0.049093	0.07875	0.07295	0.396938	0.173835	0.228434	G134	1, 2, 3, 4, 5, 6
66	1e-05	1e-05	1e-05	1e-05	1e-05	0.99995	AMD58	6
67	0.069211	0.101829	0.112948	0.300087	0.010319	0.405606	AMD40	1, 2, 3, 4, 5, 6
68	1e-05	0.005409	0.780631	0.053426	0.057148	0.103377	AMD5	2, 3, 4, 5, 6
69	1e-05	1e-05	0.99995	1e-05	1e-05	1e-05	G60	3
70	1e-05	1e-05	1e-05	1e-05	1e-05	0.99995	AMD40	6
71	1e-05	1e-05	1e-05	1e-05	0.99995	1e-05	DF30M	5
72	0.347511	0.187491	1e-05	1e-05	0.413083	0.051895	12NJ-130	1, 2, 5, 6
73	0.565687	0.048166	1e-05	0.021221	0.333844	0.031073	15T-Q479	1, 2, 4, 5, 6
74	0.006677	0.088742	0.091386	0.408326	0.372941	0.031928	38P05F	1, 2, 3, 4, 5, 6
75	0.007369	0.112856	0.005124	0.76123	0.029971	0.08345	15T-98	1, 2, 3, 4, 5, 6
76	0.025727	0.133353	0.02109	0.639146	0.05721	0.123475	LH16F	1, 2, 3, 4, 5, 6
77	1e-05	0.097711	0.026937	0.745846	0.019595	0.109901	B6F	2, 3, 4, 5, 6
78	0.023369	0.058894	0.024978	0.343719	0.135726	0.413314	ZM	1, 2, 3, 4, 5, 6
79	0.004241	0.117843	0.06874	0.765817	0.036577	0.006783	30919	2, 3, 4, 5, 6
80	1e-05	1e-05	1e-05	1e-05	1e-05	0.99995	BSA	6
81	1.2e-05	0.042155	1e-05	0.460487	0.049115	0.448221	15T-TE162	2, 4, 5, 6
82	1e-05	1e-05	0.956372	1e-05	0.043588	1e-05	DK516M	3, 5
83	0.008606	1e-05	1e-05	0.296979	0.061554	0.632841	G9	4, 5, 6
84	0.070619	0.149617	0.101491	0.545696	0.019571	0.113006	JD519F	1, 2, 3, 4, 5, 6
85	1e-05	1e-05	1e-05	1e-05	0.059324	0.940636	D3M	5, 6
86	0.021474	0.165471	1e-05	0.62105	0.119237	0.072758	D3F	1, 2, 4, 5, 6
87	1e-05	0.010644	0.00725	0.136582	0.023171	0.822343	D1M	2, 3, 4, 5, 6
88	0.00457	0.103924	0.002835	0.757786	0.039421	0.091464	D1F	2, 4, 5, 6
89	1e-05	0.152814	0.269889	0.559916	0.005362	0.012008	Z16P	2, 3, 4, 5, 6
90	0.029272	1e-05	0.717926	1e-05	1e-05	0.252772	HM1M	1, 3, 6
91	0.042507	1e-05	1e-05	0.820785	0.007754	0.128934	HM1F	1, 4, 5, 6
92	1e-05	0.085601	1e-05	0.798184	0.042411	0.073785	D2F	2, 4, 5, 6
93	1e-05	1e-05	0.049383	1e-05	0.017956	0.93263	D2M	3, 5, 6
94	1e-05	1.6e-05	1e-05	1e-05	1e-05	0.999944	38P05M	6
95	1e-05	0.063317	1e-05	0.897461	1e-05	0.039192	BZ9718	2, 4, 6
96	0.18041	1e-05	1e-05	0.056235	0.431269	0.332066	BD16M	1, 4, 5, 6
97	1.9e-05	1.6e-05	1e-05	1e-05	1e-05	0.999936	G64	6
98	0.012361	1e-05	1e-05	0.191036	1e-05	0.796573	G83	1, 4, 6
99	0.009469	0.055672	0.62343	0.10575	0.119589	0.08609	G85	1, 2, 3, 4, 5, 6
100	1e-05	1e-05	1e-05	1e-05	1e-05	0.99995	G98	6
101	0.038229	0.122088	0.142978	0.503331	0.009912	0.183462	G103	1, 2, 3, 4, 5, 6
102	1e-05	0.144494	0.073981	0.626135	1e-05	0.15537	G106	2, 3, 4, 6
103	0.041489	0.106907	0.136335	0.496526	0.022826	0.195916	G117	1, 2, 3, 4, 5, 6
104	0.109602	0.054094	0.1331	0.328632	0.102694	0.271878	G139	1, 2, 3, 4, 5, 6
105	0.12402	0.063639	0.128963	0.325123	0.091331	0.266924	G139	1, 2, 3, 4, 5, 6
106	0.738681	1e-05	1e-05	1.1e-05	0.261278	1e-05	NH101M	1, 5
107	0.018762	0.024753	0.52052	0.312999	0.122956	1e-05	7922	1, 2, 3, 4, 5
108	1e-05	1e-05	0.99995	1e-05	1e-05	1e-05	AMD25	3
109	0.022989	0.167361	0.094365	0.548022	0.00369	0.163572	AMD45	1, 2, 3, 4, 6
110	1e-05	1e-05	0.99995	1e-05	1e-05	1e-05	AMD16	3
111	0.067701	1e-05	1e-05	1e-05	1e-05	0.932259	AMD53	1, 6
112	1e-05	0.129178	0.586567	0.168638	1e-05	0.115597	AMD293	2, 3, 4, 6
113	0.655594	1e-05	1e-05	1e-05	1e-05	0.344366	XY128M	1, 6
114	1e-05	1e-05	1e-05	1e-05	0.99995	1e-05	XY686M	5
115	0.460871	1.9e-05	0.103735	1e-05	0.398407	0.036958	XY698F	1, 5, 6
116	1e-05	1e-05	0.436737	1e-05	0.563223	1e-05	PH6WC	3, 5
117	0.023213	0.297522	0.053209	0.60221	0.023836	1e-05	XD20	1, 2, 3, 4, 5
118	1e-05	1e-05	0.10252	1e-05	0.89744	1e-05	Q418	3, 5
119	0.017711	0.251661	0.143512	0.394215	0.088528	0.104372	15T-Q420	1, 2, 3, 4, 5, 6
120	0.290556	0.001713	1e-05	0.039717	0.499086	0.168919	PH6WC	1, 4, 5, 6
121	0.226578	0.158241	0.269036	0.135494	0.210642	1e-05	XF420F	1, 2, 3, 4, 5
122	0.999947	1e-05	1e-05	1e-05	1.3e-05	1e-05	DF30F	1
123	1e-05	1e-05	1e-05	1e-05	0.99995	1e-05	DF26M	5
124	1e-05	0.63478	0.019679	0.345511	1e-05	1e-05	15T-Q519	2, 3, 4
125	1e-05	0.99995	1e-05	1e-05	1e-05	1e-05	P138	2
126	1e-05	0.593348	0.007348	0.394848	1e-05	0.004436	DAN598	1, 2, 3, 4
127	0.999947	1e-05	1e-05	1e-05	1.3e-05	1e-05	XY426F	1
128	0.334625	0.09001	0.169843	0.062353	0.237574	0.105595	D405M	1, 2, 3, 4, 5, 6
129	0.043857	1e-05	1e-05	0.956103	1e-05	1e-05	D405F	1, 4
130	1e-05	0.99995	1e-05	1e-05	1e-05	1e-05	LY99M	2
131	0.590759	1e-05	1e-05	1e-05	0.409201	1e-05	XY168M	1, 5
132	1e-05	0.073144	0.38578	0.533819	0.007237	1e-05	WK702F	2, 3, 4, 5
133	0.009146	1e-05	1.5e-05	0.99081	1e-05	1e-05	LY66F	1, 4
134	0.475494	1e-05	1e-05	2e-05	1e-05	0.524456	14T-160	1, 6
135	0.559453	1e-05	0.114681	1e-05	0.325836	1e-05	HY51M	1, 2, 5
136	0.999948	1e-05	1e-05	1.2e-05	1e-05	1e-05	PH4CV	1
137	1e-05	1e-05	1e-05	1e-05	0.99995	1e-05	PH6WC	5
138	1e-05	1e-05	0.785612	1e-05	0.214348	1e-05	DK159M	3, 5
139	1.5e-05	1e-05	0.958651	1e-05	0.041305	1e-05	DK516M	3, 5
140	0.006661	0.008494	1e-05	0.533703	1e-05	0.451122	DK517F	1, 2, 4, 6
141	1e-05	1e-05	1.9e-05	2e-05	0.999931	1e-05	DK519M	5
142	1e-05	1e-05	1e-05	1e-05	1e-05	0.99995	38P05M	6
143	1e-05	0.194512	1e-05	0.641097	0.112062	0.05231	ZF	2, 4, 5, 6
144	0.018233	0.168426	0.102541	0.531665	0.072726	0.106409	B6M	1, 2, 3, 4, 5, 6
145	1e-05	0.044964	0.02642	0.780595	0.019175	0.128836	F31	2, 3, 4, 5, 6
146	1e-05	1e-05	1e-05	0.27493	0.72503	1e-05	DK159M	4, 5
147	0.012764	0.122967	0.228771	0.56433	1e-05	0.071158	DH679F	1, 2, 3, 4, 6
148	0.596991	1.7e-05	1e-05	1e-05	0.402962	1e-05	DH605F	1, 5
149	1e-05	1e-05	1e-05	0.99995	1e-05	1e-05	ZHENG58	4
150	1e-05	0.179409	1e-05	0.790257	1e-05	0.030305	C7-2	2, 4, 6
151	0.068038	1e-05	1e-05	0.921293	1e-05	0.010639	Mo17	1, 4, 6
152	1e-05	1e-05	0.99995	1e-05	1e-05	1e-05	B73	3
153	0.022646	0.064996	0.04508	0.812574	0.004503	0.050202	96C	1, 2, 3, 4, 6
154	0.038146	0.041707	0.108997	0.776797	0.022554	0.011798	Z31	1, 2, 3, 4, 5, 6
155	1e-05	0.163943	0.04456	0.715484	0.050243	0.02576	K12	2, 3, 4, 5, 6
156	1e-05	0.07512	0.303108	0.621742	1e-05	1e-05	YE478	2, 3, 4
157	0.015566	0.295848	0.000942	0.610091	0.004531	0.073022	5003	1, 2, 4, 6
158	1.2e-05	0.999947	1e-05	1.1e-05	1e-05	1e-05	QI319S	2
159	1e-05	0.062833	0.308097	0.62904	1e-05	1e-05	HUANGZAO4	2, 3, 4
160	1e-05	0.673394	1e-05	0.274593	1e-05	0.051983	E28S	2, 4, 6
